# Supplementary material for: On the Spillover Effects of Online Product Reviews on Purchases: Evidence from Clickstream Data
Source: Atypon-hosted journal article supplement (doi:10.1287/isre.2021.0998), 2021-05-14
Supplement: isre.2021.0998.sm1.docx [file isre.2021.0998.sm1.docx]

**Online Supplementary Appendix A**

**Additional Robustness Checks I: Logit Regressions**

Because our dependent variable, *purchase* (purchase or not), is a binary variable, a discrete choice model might be more appropriate than the linear probability model (LPM). Therefore, in Table A.1, we conducted a logit regression and a fixed effect logit regression (FE-Logit), and we found our results to be robust to the main results.

**Table A.1 Logit Regression and Fixed-Effect Logit Regression**

|  | (1) | (2) | (3) | (4) |
| --- | --- | --- | --- | --- |
| VARIABLES | Logit Home | Logit Tech | FE-Logit Home | FE-Logit Tech |
|  |  |  |  |  |
| rating_focal | 0.117*** | 0.0383* | 0.176*** | 0.232*** |
|  | [10.14] | [1.854] | [5.657] | [3.431] |
| vol_focal | 0.000165*** | 0.000134 | 0.000423*** | 0.000724** |
|  | [8.324] | [1.423] | [6.534] | [2.254] |
| rating_subs | -0.213*** | -0.258*** | -0.114*** | -0.152*** |
|  | [-42.13] | [-33.24] | [-9.562] | [-6.142] |
| rating_comp | 0.125*** | 0.0826*** | 0.254*** | 0.343*** |
|  | [34.22] | [14.15] | [8.532] | [5.156] |

z-statistics in brackets: *** p<0.01, ** p<0.05, * p<0.1

**Additional Robustness Checks II: Price and Review Rating Endogeneity**

In our model, prices may be endogenous since prices may change in response to demand, and consumers change their demand in response to prices. To address this potential price endogeneity and to confirm the validity of our machine learning-based classification of substitutes/complements, we estimated Equation A1:

[A1]

In columns 1 and 2 (Table A2), we find that in both the Home/Garden and Technology categories, the coefficient on *price_subs* is positive, and the coefficient on *price_comp* is negative. These findings are consistent with the economic definitions of substitutes and complements using cross-price elasticity (Mas-Colell et al. 1995). These results confirm the validity of our product relationship classification measures: an increase in the price of substitutes affects the purchase of a focal product positively; and an increase in the price of complements affects the purchase of a focal product negatively.

These findings are merely “suggestive” since the prices of substitutes and complements may not be exogenously determined in our context. Some unobserved factors can drive both the demand of the focal product and the prices of its substitutes or complements, and therefore, the correlation shown in columns 1 and 2 of Table A2 may not capture the true causal effect of the prices of substitutes or complements on the focal product purchases. More specifically, in our context, we want to estimate the response of a focal consumer’s purchase decision to exogenous changes in *price_focal*, *price_comp*, and *price_subs*. However, prices may not be exogenously determined since they are determined in part by market demand. Following Berry et al. (1995), Granados et al. (2012), and Chung et al. (2013), we addressed this potential endogeneity problem by performing a two-stage least squares (2SLS) regression with Instrumental Variables (IVs) for *price_focal*, *price_comp*, and *price_subs*. The intuition is that we identify IVs that shift cost or margins and are not correlated with product demand shock. Notably, Chung et al. (2013) used the total number of products from a firm as an IV for price. Similarly, in our context, we adopted the total number of products from a brand as an IV for *price_focal*. As for *price_comp* and *price_subs*, we first identified the complements or substitutes of a focal product *i*. We denote *C(i)* as the set of focal product *i*’s complements, and *S(i)* as the set of focal product *i*’s substitutes. For each substitute product *j* *S(i)*, we identified *j*’s brand and calculated the total number of products from this brand. Then, we used the average number of products within a brand as an IV for *price_subs*. Similarly, we defined an IV for the price of complementary products (*price_comp*).

**Table A.2 Addressing Price Endogeneity and Rating Endogeneity Using Instrumental Variables**

|  | (1) | (2) | (3) | (4) | (5) | (6) |
| --- | --- | --- | --- | --- | --- | --- |
| VARIABLES | FE Home | FE Tech | FE + Price IV Home | FE + Price IV Tech | FE + Rating IV Home | FE + Rating IV Tech |
| rating_focal | 0.00302*** | 0.00302*** | 0.00232*** | 0.00382** | 0.00386*** | 0.00284*** |
|  | [3.103] | [2.954] | [3.334] | [2.743] | [2.934] | [3.128] |
| vol_focal | 3.42e-06** | 4.54e-06 | 1.42e-06** | 9.62e-06 | 4.21e-06 | 1.74e-06 |
|  | [2.317] | [0.882] | [2.226] | [0.684] | [0.664] | [1.426] |
| rating_subs | -0.00422*** | -0.00462*** | -0.00534*** | -0.00435*** | -0.00532*** | -0.00481*** |
|  | [-8.434] | [-5.427] | [-9.762] | [-4.853] | [-7.653] | [-6.105] |
| rating_comp | 0.00632*** | 0.0153*** | 0.00924*** | 0.0232** | 0.0132*** | 0.0112*** |
|  | [4.523] | [4.782] | [5.214] | [2.213] | [7.431] | [6.217] |
| price_focal | -1.25e-05 | 6.84e-06 | -3.34e-05** | -9.33e-05 | -7.54e-05** | -4.03e-05** |
|  | [-0.515] | [0.782] | [-2.272] | [0.173] | [2.128] | [2.014] |
| price_subs | 0.000122*** | 2.52e-06 | 0.000433*** | 1.32e-05** | 1.64e-05** | 1.56e-05** |
|  | [3.145] | [0.156] | [2.724] | [2.206] | [2.107] | [2.115] |
| price_comp | -6.65e-05*** | -2.27e-05 | -9.43e-05** | -8.45e-05** | -7.12e-05** | -8.04e-05** |
|  | [-2.832] | [-1.523] | [-2.135] | [-2.432] | [-2.142] | [-2.063] |
| Observations | 21,159 | 17,254 | 21,159 | 17,254 | 21,159 | 17,254 |

Cluster robust t-statistics in brackets: *** p<0.01, ** p<0.05, * p<0.1

For the total number of products from a brand to be a valid IV for prices in our regression model, it has to be (i) correlated with price and (ii) uncorrelated with the error term so that the total number of products from a firm influences individual *i*’s purchase decision on product *j* only through price. Chung et al. (2013) argued that a firm’s product count is a standard IV in the industrial organization literature and satisfies both conditions (i) and (ii). It is also well known that if the correlation specified in condition (i) is weak, IV methods can be ill-behaved and may cause severe inconsistency (Stock et al. 2002). To address this concern, we tested whether our IVs are weak by calculating the first-stage *F* statistics based on the method proposed by Stock et al. (2002) and modified by Angrist and Pischke (2008). Please note that the conventional first-stage *F* statistic is not appropriate in our case because we have multiple endogenous price variables in our regression; thus, we adopted the multivariate first-stage *F* statistics (Angrist and Pischke 2008). A high multivariate *F* statistic (24.33) suggests that our IVs are not weak. Also, in our context, the exclusion restriction is plausible: our IV, the total number of products from a brand, should affect our dependent variable, individual *i*’s purchase decision on product *j* only indirectly, only through the correlation with price.

Following Angrist and Krueger (2001) and Acemoglu et al. (2001), we conducted a test on the exclusion restriction by including the number of products from a brand as an independent variable, and the coefficient was not statistically significant. This result is encouraging and shows no evidence for a direct effect of a firm’s product count on the consumer’s purchase decision of the focal product. The intuition is based on the assumption that if the only impact of a firm’s product count on the consumer’s purchase decision is through price, then the firm’s product count should be insignificant in a regression equation that also includes price as another independent variable.

If we do not suffer from price endogeneity, both the fixed effect estimator and the fixed effect IV estimator would be consistent, but the fixed effect IV estimator may be inefficient. In other words, the fixed effect estimation is preferred to the fixed effect IV estimation, assuming the model does not suffer from endogeneity (Wooldridge 2002). Therefore, we also conducted the Hausman test (1978) to check for endogeneity,[[1]](#footnote-1) and we could reject the null hypothesis that the fixed effect estimators of prices presented in columns 1 and 2 (Table A2) are consistent estimators. Columns 3 and 4 (Table A2) show the estimation results of 2SLS with IVs. Once again, the coefficient on *price_subs* is positive, and that on *price_comp* is negative. The IV estimation results confirm the validity of our measures of complementary and substitutive products: a negative cross-price elasticity of demand denotes that the two products are complements, while a positive cross-price elasticity of demand denotes substitutes. The econometrics literature shows that even if IVs do not perfectly satisfy the exclusion restriction, one can still draw valid statistical inferences using the Anderson and Rubin (AR) test and the fractionally-resampled Anderson Rubin (FAR) test (Riquelme et al. 2013). As an additional robustness check, we conducted these two tests in our IV regression, and we found that the *p*-values of the coefficients on *price_subs* and *price_comp* are less than 0.01, thus further confirming our results (Table A2).

Another potential concern in our previous regression model is that the mean review ratings of substitutive and complementary products may be endogenously determined. To address this potential endogeneity concern, we used a more exogenous IV following Jabr and Zheng (2014). More specifically, our proposed IV for a product’s review rating is the review ratings of other products posted by the same reviewers. The intuition is that an online review reflects both the reviewer’s evaluation on the product and her personal predisposition for the rating. Predisposition captures a reviewer’s idiosyncratic tendency to write a specific review and can be estimated by examining the reviewer’s historical reviews. Note that predisposition constructed in this manner ensures to predate the time the reviewer posts her product review, and is uncorrelated with product characteristics. Therefore, our new IV should be more exogenous. We instrumented for and using the mean review ratings of other products posted by the same reviewers. We also tested whether our IVs are weak by calculating the multivariate first-stage *F* statistics. A high multivariate *F* statistic (32.54) suggests that our IVs are not weak. The estimation results are shown in columns 5 and 6 of Table A2. We find that our results are robust: the mean rating of substitutes has a negative role in the purchase probability of the focal product, while the mean rating of complements has a positive role in the purchase probability of the focal product.

We also checked the coefficients on *price_subs* (*price_comp*) at the product pair-wise level. Because for one focal product, typically, we have several substitutes or complements, we generated two new variables: the price of a randomly selected substitutes/complement (*price_subs_random* and *price_comp_random*). At the product pair-wise level, we re-estimated our model. The results are consistent and are shown in Table A3: positive (negative) coefficient for *price_subs_random* (*price_comp_random*) validates the classification.

**Table A.3 Robustness Check: Price of A Randomly-Selected Substitutes/Complements**

|  | (1) | (2) |
| --- | --- | --- |
| VARIABLES | FE Home | FE Tech |
| rating_focal | 0.00253*** | 0.00274** |
|  | [2.554] | [2.133] |
| vol_focal | 3.72e-06** | 4.15e-06 |
|  | [2.223] | [0.823] |
| rating_subs | -0.00732*** | -0.00421*** |
|  | [-10.15] | [-5.237] |
| rating_comp | 0.00742*** | 0.00714*** |
|  | [6.542] | [3.854] |
| price_focal | -5.23e-05*** | -1.24e-05 |
|  | [-3.245] | [-1.687] |
| price_subs_random | 0.000158*** | 2.24e-05** |
|  | [3.214] | [2.045] |
| price_comp_random | -5.53e-05*** | -2.65e-05** |
|  | [-3.825] | [-2.154] |
| Observations | 21,159 | 17,254 |

Cluster robust t-statistics in brackets: *** p<0.01, ** p<0.05, * p<0.1

**Online Supplementary Appendix B**

**Machine-Learning and Text-Mining Based Identification of Substitutive and Complementary Products**

Our paper analyzes how a focal product purchase is affected by the online reviews of related products in a large number of individual shopping sessions. Thus, a critical task is to identify complementary versus substitutive product pairs in an *automated* and *scalable* manner. Some studies identified competing products (Jabr and Zheng 2014) and brands (Luo et al. 2017); however, existing approaches may not readily apply in this study due to scalability and generalizability. For example, Luo et al. (2017) studied nine competing brands in the PC industry, and Jabr and Zheng (2014) identified one to three competing books for 1,740 books at an *aggregate* level, a strategy that only works for popular products. However, we seek to capture the relationships (both *substitutive* and *complementary*) among 30,000 products in more than 300,000 *individual* user shopping sessions.

To address the challenge, we designed a novel machine-learning based identification process drawing upon the classic definition of substitutive and complementary products from the marketing literature (Walters 1991). In this definition, related products are defined by the individual consumer’s perception of them. Therefore, we first created related product pairs that are co-viewed within a single consumer’s purchasing session (which on average spans less than an hour). Most recommender systems rely on this approach since co-visited products are likely to be related. Many consumers are likely to visit multiple substitutive products (e.g., TVs from different brands) to choose the best product possible, while other consumers may visit multiple complementary products that work together for a specific goal (e.g., TV and a DVD player).

The next step, after characterizing related products, is to distinguish substitutive product pairs from complementary ones. A conventional way used in the retail industry is to use pre-defined product categorizations. Online retail websites often have a tree-based product category structure. A pair of products is regarded as substitutes if the two products belong to the same subcategory; and as complements if they belong to the same root category but to different subcategories. However, this method is prone to misclassification errors.We communicated with an industry expert team supporting multiple online retail stores to hear anecdotal cases where the retails or the merchants misclassified products. In addition, a product can only be categorized into a single subcategory, which is often too broadly defined (e.g., Laptop & PC software). Lastly, the category-based classification method has limited expressive power, as the resulting value is binary: two products are either substitutes or complements.

To overcome these challenges, we followed prior studies (Lee et al. 2020; Shin et al. 2020) and developed a supervised machine learning approach using novel text-mining-based product features and training data generated from crowdsourcing. First, we collected product relationship classification labels (e.g., substitutes, complements, unrelated products) of 16,000 product pairs from Amazon Mechanical Turk (AMT). Then, using the collected labeled data as the training data, we built predictive models using various classification algorithms, including neural network-based deep learning. We constructed novel features from product information, description, past visit records, and reviews. The predictive models achieved prediction accuracies (F-1 scores) of 98.86% (99.64%), 87.41% (95.75%), 98.99% (97.48%) for substitutes, complements, and unrelated products in Home/Garden (Technology) data.

Lastly, we used the collected AMT labels and predicted labels to calculate the average product ratings of substitute or complementary products for a given focal product.

The detailed procedures are described in the following.

## B.1 Collecting Labels from Amazon Mechanical Turk

First, we gathered 8,000 product pairs of Home/Garden products, where 6,000 pairs are randomly sampled from 744,150 product pairs that are co-visited by at least one consumer in our clickstream data and the other 2,000 pairs are randomly generated from the entire Home/Garden product set. Similarly, 8,000 Technology product pairs are collected, where 6,000 of them are randomly sampled from 110,752 co-visited pairs and 2,000 are randomly generated. For each of the product pairs, we asked 5 AMT workers to label the relationship of the product pair into substitute goods, complementary goods, or unrelated goods. Before conducting the labeling, the workers are given descriptions and examples of each product relationship, as in Table B.1.

**Table B.1 Product relationship descriptions and examples provided to AMT workers**

| Categorization | Description | Examples |
| --- | --- | --- |
| Substitute goods | A substitute good is a good that can be used in place of another. In other words, substitute goods have an equivalent function and one substitute good can be consumed or used in place of another. | Coca Cola and Pepsi  CDs and MP3  Ice cream and frozen yogurts  Powered and liquid laundry detergent |
| Complementary goods | A complementary good is a good that is consumed along with some another product. In other words, it is a good whose use is related to the use of an associated or paired good. | Toothbrushes and toothpaste  Digital cameras and SD card  iPhone and iPhone cover  Printer and Ink Cartridge |
| Unrelated goods | Unrelated goods are products whose uses are not related. | Toothbrushes and motorcycles  Digital cameras and iPhone cover  Computer monitor and SD card |

Then, in each task, AMT workers are provided with two products’ information (e.g., product name, brand, description, image) and are asked to choose the best relationship category (1: substitute, 2: complementary, or 3: unrelated) for a pair of products. Table B.2 is a sample task for a Technology product pair. In our data, all 5 workers unanimously labeled this pair as substitutes.

To ensure the quality of the collected labels, we selected U.S.-based English-speaking workers who are experienced (i.e., completed more than 50 AMT tasks) and well-performing (i.e., have higher than 90% approval rates). Furthermore, we excluded the labels collected from unreliable workers whose labels did not match with the majority vote in more than 40% cases.

We report the inter-rater reliability measure, Cohen’s kappa, to be 0.87 in Home/Garden data and 0.78 in Technology data. According to McHugh (2012), 0.80-0.90 is considered as “strong agreement” and 0.60-0.79 as “moderate agreement”, which indicates that Technology products are relatively harder to classify. In addition, we report Cronbach’s alpha (another measure of the reliability of a set of test items): 0.95 for Home/Garden data and 0.94 in Technology data, which exceeds the commonly accepted threshold of 0.7.

**Table B.2 A sample AMT task from Technology products data**

| Product image | 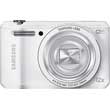 | 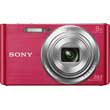 |
| --- | --- | --- |
| Product name | Samsung WB36F 16MP Compact Digital Camera - White. | Sony Cybershot W830 20.1MP Compact Digital Camera - Pink. |
| Brand | Samsung | Sony |
| Product description | The white Samsung WB36F Compact Camera is a stylish option you can take anywhere. A 16.2MP sensor is paired with a 12x zoom lens to get you close to the action. Connect via Wi-Fi and NFC connectivity as you share your shots with ease. The 3 touchscreen delivers bright, crisp image playback and intuitive control for easy operation.  - 16 megapixels.  - 12x optical zoom.  - 21x digital zoom.  - 2.7in LCD screen.  - Continuous shooting up to 5 frames per second.  - Image stabilisation  - Red eye reduction.  - Wi-Fi.  - 1080p high-definition video capture and playback with sound.  - Maximum ISO 3200.  - Intelligent scene mode.  - Blink detection.  - Self timer.  - Built-in flash.  - microSDHC, microSD.  - Size H6, W10cm.  - Weight 145g.  - Depth 3cm (when switched off).  - Batteries required: 1 x Li-Ion (included).  - Colour: white.  - Includes USB cable, carry strap. | - 20.1 megapixels.  - 8x optical zoom.  - 64x digital zoom.  - 2.7in LCD screen.  - Continuous shooting up to 0.8 frames per second.  - Face detection up to 8 faces.  - Image stabilisation.  - Red eye reduction.  - 720p high-definition video capture and playback with sound.  - Maximum ISO 3200.  - Intelligent scene mode.  - Blink detection.  - Self timer.  - Built-in flash.  - SD, SDHC, SDXC, Memory Stick Pro Duo, compact flash.  - Size H5.25, W9.31cm.  - Weight 104g.  - Depth 9.31cm (when switched off).  - Colour: pink.  - Includes USB cable, AV cable, carry strap. |
| Please pick the best category for this pair of products.  [ ] substitute  [ ] complementary  [ ] unrelated | | |

**Table B.3 AMT data description**

| AMT Data | Home/Garden products | | Technology products | |
| --- | --- | --- | --- | --- |
|  | 6,000 pairs with co-visits | 2,000 random pairs | 6,000 pairs with co-visits | 2,000 random pairs |
| Product pairs by votes | | | | |
| 5-0 votes (unanimous) | 3,335 (55.58%) | 1,698 (84.90%) | 3,205 (53.42%) | 1,543 (77.15%) |
| 4-1 votes | 1,398 (23.30%) | 210 (10.50%) | 1,413 (23.55%) | 286 (14.30%) |
| Other votes | 1,267 (21.12%) | 92 (4.60%) | 1,382 (23.03%) | 171 (8.55%) |
| Among product pairs with 5-0 votes | | | | |
| Substitutes | 1,667 (49.99%) | 3 (0.18%) | 2,194 (68.46%) | 7 (0.45%) |
| Complements | 93 (2.79%) | 3 (0.18%) | 370 (11.54%) | 0 (0.00%) |
| Unrelated | 1,575 (47.23%) | 1,692 (99.65%) | 641 (20.00%) | 1,536 (99.55%) |
| Among product pairs with 5-0 or 4-1 votes | | | | |
| Substitutes | 2,043 (43.17%) | 22 (1.15%) | 2,691 (58.27%) | 20 (1.09%) |
| Complements | 269 (5.68%) | 18 (0.95%) | 721 (15.61%) | 8 (0.44%) |
| Unrelated | 2,421 (51.15%) | 1,868 (97.90%) | 1,206 (26.12%) | 1,801 (98.47%) |
| AMT Workers | | | | |
| # of AMT Workers | 248 | 62 | 261 | 44 |
| # of Reliable Workers | 236 | 62 | 247 | 40 |

**B.2 Constructing Features from Product Information**

Next, we constructed features that can help us to predict the product relationship labels. Each product has various meta-information, such as brand and product category, with which we constructed dyadic dummy variables, such as *brand_match* and *category_match*. Brand and category matches are the traditional approach used in prior research and industry practice. We will call these two features as the “baseline.” Second, we leveraged the rich textual information for each product. Specifically, we used the product name pairs and calculated string-wise similarity measures using the gestalt pattern matching algorithm. Besides, we leveraged the product descriptions. Each product page includes a detailed textual description (474 characters on average) about the product from which various product features can be extracted. We measured the product feature similarity by applying topic modeling on the product descriptions. Given its successful applications of many tasks in the management literature (e.g., Lee et al. 2020, Singh et al. 2014, Tirunillai and Tellis 2014, Shi et al. 2016, Shin et al. 2020), we adopted the Latent Dirichlet Allocation (LDA) (Blei et al. 2003) topic modeling to extract product features from product descriptions.[[2]](#footnote-2) LDA is a statistical method that discovers abstract “topics” from a large collection of text documents. In our case, we treated each topic as a product feature/category. We developed two separate LDA topic models from the 27,714 Home/Garden products and 7,492 Technology products. We set the number of topics to 50, as justified in subsection B.5. Tables B.11 and B.12 show partial topic model results from the Home/Garden and Technology product categories, respectively. Based on the constructed topic model, each product can be represented as a 50-dimensional product feature (topic) vector where each element corresponds to the weight with respect to a feature. Then, given a pair of co-visited products, the cosine similarity between the two topic vectors was calculated as the product similarity.[[3]](#footnote-3)

The resulting value from cosine similarity ranges from 0.0 to 0.1, where 0.0 indicates no common feature between the two and 1.0 indicates a complete overlap of features. In addition to the similarity measure, we also used two topic vectors themselves as the features since they may capture some unique aspects of the two products. We grouped these as the “text” features.

Third, we leveraged the co-visit information as additional features. The idea is that if two products were co-viewed in many shopping sessions, then they should be somehow related. The focal online retailer keeps track of four distinct clicks: page views, impressions, used features, and transactions. We termed these as “co-visit” features. Lastly, we also considered the cross-referencing behavior in product reviews. Specifically, we identified the number of product reviews that mention the other product’s name (or brand).

To summarize, below are the features we use for product relationship predictions:

- Baseline: *category_match* + *brand_match*
- Text: name similarity, 50-topic vectors, similarity of topic vectors (10, 20, 50, 100, 200)
- Co-visit: using historical clicks[[4]](#footnote-4)
- Review: cross-reference in review text[[5]](#footnote-5)

Table B.4 shows the description and summary statistics of these features.

**Table B.4 Feature Description and Summary Statistics**

| Feature Name | Description  (P1: product 1; P2: product 2) | Home/Garden | Technology |
| --- | --- | --- | --- |
| mean (stdev)  min / max | mean (stdev)  min / max |
| **Baseline features from product information** | | | |
| *brand_match* | 1 if P1 and P2 are from the same brand; 0 otherwise | 0.09 (0.29)  0 / 1 | 0.15 (0.36)  0 / 1 |
| *category_match* | 1 if P1 and P2 are in the same category; 0 otherwise | 0.32 (0.47)  0 / 1 | 0.40 (0.49)  0 / 1 |
| **Text-based features from product names and descriptions** | | | |
| *name_sim* | name similarity of P1 and P2 using gestalt pattern matching | 0.57 (0.15)  0.02 / 1.00 | 0.41 (0.20)  0.04 / 1.00 |
| *product_topicsim_10* | cosine similarity of P1 and P2’s topics in 10-topic model | 0.59 (0.46)  0.00 / 1.00 | 0.60 (0.45)  0.00 / 1.00 |
| *product_topicsim_50* | cosine similarity of P1 and P2’s topics in 50-topic model | 0.41 (0.47)  0.00 / 1.00 | 0.45 (0.46)  0.00 / 1.00 |
| *product_topicsim_100* | cosine similarity of P1 and P2’s topics in 100-topic model | 0.33 (0.44)  0.00 / 1.00 | 0.40 (0.45)  0.00 / 1.00 |
| *product_topicsim_200* | cosine similarity of P1 and P2’s topics in 200-topic model | 0.27 (0.41)  0.00 / 1.00 | 0.33 (0.42)  0.00 / 1.00 |
| **Features from consumer co-visits** | | | |
| *pageviews_count* | # of co-visits in P1 and P2’s product pages | 1.29 (1.63)  0 / 118 | 1.68 (2.93)  0 / 118 |
| *impressions_count* | # of co-visits in P1 and P2’s review or Q&A pages | 0.94 (1.76)  0 / 132 | 1.49 (3.24)  0 / 143 |
| *usedfeatures_count* | # of co-engagements in P1 and P2’s reviews or Q&A | 0.12 (0.53)  0 / 36 | 0.24 (0.80)  0 / 30 |
| *transactions_count* | # of co-purchases of P1 and P2 | 0.02 (0.14)  0 / 14 | 0.02 (0.15)  0 / 11 |
| *total_count* | sum of four co-visit counts | 2.29 (3.67)  1 / 275 | 3.42 (6.72)  1 / 284 |
| **Features from online product reviews** | | | |
| *crossref_count_12* | # of P1’s reviews mentioning P2 | 0.00 (0.00)  0 / 2 | 0.00 (0.00)  0 / 1 |
| *crossref_count_21* | # of P2’s reviews mentioning P1 | 0.00 (0.00)  0 / 1 | 0.00 (0.01)  0 / 2 |
| *brand_crossref_12* | # of P1’s reviews mentioning P2’s brand | 0.14 (2.00)  0 / 406 | 0.70 (4.54)  0 / 381 |
| *brand_crossref_21* | # of P2’s reviews mentioning P1’s brand | 0.20 (3.02)  0 / 406 | 0.66 (4.75)  0 / 453 |
| # of observations |  | 714,958 | 110,354 |

**B.3 Building Predictive Models using Classification Algorithms**

We use the aforementioned features in the classification models. For the target label, we use the “substitute”, “complement”, and “unrelated” labels from the product pairs with unanimous votes from the AMT experiment.

**Two binary classifiers:** While our task can be regarded as a multiclass classification problem, we found that converting the problem into two consecutive binary classification problems yielded better performance. Thus, we implement two binary classifiers: The first classifier (CLF1) would predict the label to be “substitute” or “not substitute”. Then the second classifier (CLF2) is applied on the samples that were labeled as “not substitute” by CLF1 to then predict the label to be “unrelated” or “complement”.[[6]](#footnote-6)

**Classification algorithms:** For both classifiers, we leverage the following standard classification algorithms: k-Nearest Neighbors (KNN), support vector machine (SVM), logistic regression (LOGIT), least absolute shrinkage and selection operator (LASSO), random forest (RF), deep feed-forward neural network (NN1), geometric shrinking neural network (NN2), hourglass neural network (NN3), inverse hourglass neural network (NN4), convolutional neural network (NN5), dropout neural network (NN6), batch normalization neural network (NN7), dropout batch normalization hourglass neural network (NN8), dropout batch normalization inverse hourglass neural network (NN9). Each model requires hyperparameter tuning. Table B.5 overviews the range of hyperparameters tested in our cross-validation experiments. For all neural network models, we used Python’s Keras implementations[[7]](#footnote-7) with the following parameters: rectified linear unit (RELU) for the activation function, Adam for the optimizer (Kingma and Ba 2015), categorical cross entropy for the loss function, and accuracy as the metric. For other classification algorithms, we used Python’s scikit-learn implementations.[[8]](#footnote-8)

**Table B.5 Hyperparameters for classification algorithms**

| Model | Hyperparameters and their tested ranges |
| --- | --- |
| KNN | neighbors=1, 3, 5, 7, 9, 11 |
| LASSO |  |
| LOGIT |  |
| RF | max_depth=1, 2, 4, 8, 16, 32, 64, estimators=20, 30, 40, 50, 100 |
| SVM | kernel = rbf, linear, poly, sigmoid |
| NN1 | n_nodes=16~256, n_layers=2~8 |
| NN2 | n_nodes=16~256, n_layers=2~8 |
| NN3 | n_nodes=4~128, n_layers=1, 3, 5, 7, 9 |
| NN4 | n_nodes=16~256, n_layers=1, 3, 5, 7, 9 |
| NN5 | nb_filter=15, 20, 25, 30, filter_length=2~7 |
| NN6 | n_nodes=16~256, n_layers=2~8, extra_layers=dropout |
| NN7 | n_nodes=16~256, n_layers=2~8, extra_layers=batch |
| NN8 | n_nodes=64~256, n_layers=3, 5, 7, extra_layers=dropout, batch, dropout+batch |
| NN9 | n_nodes=64~256, n_layers=3, 5, 7, extra_layers=dropout, batch, dropout+batch |

**Oversampling for class imbalance issue:** As mentioned earlier, our training data set has a class imbalance issue where the majority of the labels are substitutes or unrelated, while there are only a small number of complements labels. To address this issue, we use synthetic minority over-sampling technique (SMOTE) to oversample complement observations (Chawla et al. 2002). Note that the oversampling only affects the training data, but not the validation or testing data.

**Performance evaluation using cross validation with validation and test sets:** Given that we have many hyperparameters to tune (especially in the neural network models), we take the approach of using cross validation with validation and test sets.

The first step is to find the best model hyperparameters. To do that, we conduct 5 cross validation experiments. In each experiment, we split the full AMT sample into 60% training set, 30% validation set, and 10% hold-out test set with stratification. Different models and hyperparameters are trained with the training set and tested on the validation set. Then the best model and hyperparameters are selected based on the average F-1 score performance across the 5 experiments.

Once the best model and hyperparameters are chosen, the second step is to evaluate them. To do that, we conduct 5 cross validation experiments. In each experiment, with 90% training and 10% test split data with stratification, the model is trained using 90% training data and the trained model is evaluated against the 10% test data. We report the average precision, recall, F-1 scores across the 5 experiments. Since we have an imbalanced class issue, we report these measures for each of the three target labels: substitutes, complements, and unrelated products.

This entire process is used to obtain the best performing CLF1 and CLF2 selected by F-1 score. CLF1 is trained on a dataset that contains samples of all three labels, while CLF2 is trained on a dataset that only contains “unrelated” and “complement” samples. The best performing CLF1 and CLF2 are then used sequentially to create a multiclass classifier. CLF1 will first classify a pair of products as “substitutes” or “not substitutes”. The samples that are labelled as “not substitutes” will then be classified by CLF2 as “complements” or “unrelated products”. We display the metrics of the multiclass classifier for all three possible labels. We tested all combinations of feature sets, models, and hyperparameters.

Table B.6 shows the results from the best models and hyperparameters from each feature combination. First, we found that in both product samples (Home/Garden and Technology), the models with baseline and topic model features show the best performance across the three labels (substitute, complementary, unrelated). The achieved F-1 scores are encouraging: The F-1 scores for substitutes and unrelated products are as high as 97%~99% and even those for complements (which had a relatively smaller number of observations) are 87.41% and 95.75% for Home/Garden and Technology products, respectively. Second, the results also show that the baseline model (using product category and brand information) suffers from the poor performance: F-1 scores of 21.55% (Home/Garden) and 34.18% (Technology). In the Home/Garden data, comparing to the baseline models, our best models achieved 4%, 305%, 19% improvements for substitutes, complements, and unrelated products, respectively. Similarly, our model achieved similar levels of improvements (4% for substitutes, 180% for complements, and 27% for unrelated products). The results show that it is important to include text analytics in the product relationship classification task.

**Table B.6 Prediction Accuracy Comparison across Features and Models**

(a) Prediction results with Home/Garden products

| Home/Garden products | Algorithm | Precision | | | Recall | | | F-1 | | |
| --- | --- | --- | --- | --- | --- | --- | --- | --- | --- | --- |
| Subs | Comp | Unre | Subs | Comp | Unre | Subs | Comp | Unre |
| Individual features | | | | | | | | | | |
| Baseline | CLF1=RF-4-40  CLF2=KNN-9 | 98.86 | 12.89 | 91.33 | 91.50 | 66.67 | 76.84 | 95.01 | 21.55 | 83.41 |
| Text | CLF1=NN7-256-2  CLF2=KNN-3 | 98.34 | 61.88 | 99.35 | 99.16 | 80.00 | 96.71 | 98.75 | 69.35 | 98.01 |
| Co-visit | CLF1=NN5-30-2  CLF2=RF-4-20 | 65.12 | 6.50 | 61.78 | 60.72 | 4.44 | 68.10 | 62.78 | 5.21 | 64.72 |
| Review | CLF1=LOGIT  CLF2=LOGIT | 64.37 | 0.59 | 38.48 | 7.66 | 20.00 | 76.96 | 13.65 | 1.14 | 51.31 |
| Combined features | | | | | | | | | | |
| Base+Co-visit | CLF1=RF-8-30  CLF2=RF-8-40 | 99.36 | 19.95 | 91.27 | 91.98 | 55.56 | 88.73 | 95.51 | 28.78 | 89.95 |
| Base+Review | CLF1=RF-8-30  CLF2=RF-2-40 | 99.23 | 8.65 | 90.48 | 92.57 | 33.33 | 82.41 | 95.78 | 13.68 | 86.19 |
| **Base+Text** | CLF1=NN9-256-3-2  CLF2=NN3-64-1 | **99.04** | **91.28** | **98.63** | **98.68** | **84.44** | **99.37** | **98.86** | **87.41** | **98.99** |
| Base+Text  +Co-visit | CLF1=LOGIT  CLF2=NN3-32-1 | 98.90 | 76.55 | 97.64 | 96.89 | 82.22 | 99.24 | 97.88 | 78.99 | 98.43 |
| Base+Text  +Review | CLF1=KNN-5  CLF2=NN3-32-1 | 98.44 | 90.5 | 97.63 | 97.84 | 75.56 | 99.11 | 98.14 | 81.32 | 98.37 |
| Base+Text+  Covisit+Review | CLF1=LOGIT  CLF2=NN1-16-2 | 98.78 | 75.82 | 97.64 | 96.89 | 80.00 | 99.24 | 97.82 | 77.62 | 98.43 |

(b) Prediction results with Technology products

| Technology products | Algorithms | Precision | | | Recall | | | F-1 | | |
| --- | --- | --- | --- | --- | --- | --- | --- | --- | --- | --- |
| Subs | Comp | Unre | Subs | Comp | Unre | Subs | Comp | Unre |
| Individual features | | | | | | | | | | |
| Baseline | CLF1=NN6-128-4  CLF2=NN6-256-3 | 98.03 | 66.30 | 64.21 | 93.61 | 24.86 | 95.62 | 95.74 | 34.18 | 76.80 |
| Text | CLF1=NN9-256-3-1  CLF2=KNN-1 | 99.55 | 94.71 | 98.73 | 99.91 | 95.68 | 96.88 | 99.73 | 95.17 | 97.79 |
| Co-visit | CLF1=KNN-11  CLF2=KNN-7 | 72.16 | 30.67 | 34.7 | 81.64 | 4.32 | 31.25 | 76.28 | 6.37 | 30.26 |
| Review | CLF1=RF-1-100  CLF2=NN4-16-3 | 85.50 | 0.00 | 25.7 | 33.06 | 0.00 | 94.06 | 47.43 | 0.00 | 40.34 |
| Combined features | | | | | | | | | | |
| Base+Co-visit | CLF1=RF-4-30  CLF2=RF-4-20 | 98.50 | 59.99 | 78.53 | 94.52 | 58.92 | 90.00 | 96.46 | 59.30 | 83.83 |
| Base+Review | CLF1=RF-8-100  CLF2=LASSO | 99.06 | 49.15 | 75.76 | 94.34 | 57.84 | 80.00 | 96.63 | 53.04 | 77.77 |
| **Base+Text** | CLF1=NN9-256-3-2  CLF2=KNN-1 | **99.64** | **94.34** | **98.43** | **99.63** | **97.30** | **96.56** | **99.64** | **95.75** | **97.48** |
| Base+Text  +Co-visit | CLF1=LASSO  CLF2=RF-64-40 | 99.54 | 89.99 | 96.94 | 98.17 | 95.14 | 98.12 | 98.85 | 92.40 | 97.52 |
| Base+Text  +Review | CLF1=LASSO  CLF2=NN6-256-2 | 99.54 | 88.86 | 90.78 | 98.08 | 84.32 | 97.19 | 98.80 | 85.77 | 93.74 |
| Base+Text+  Covisit+Review | CLF1=LASSO  CLF2=LASSO | 99.45 | 70.80 | 85.78 | 98.17 | 74.59 | 86.88 | 98.81 | 72.62 | 86.31 |

Table B.7 shows the best models and hyperparameters for CLF-1 and CLF2 in Home/Garden and Technology samples. Interestingly, the best CLF-1 model architectures are identical across the two product categories. But in CLF-2, a simple neural network performs best in Home/Garden data, while KNN performs best in Technology data.

**Table B.7 Best classifiers with models and hyperparameters**

|  | Home/Garden data | Technology data |
| --- | --- | --- |
| Best CLF-1  (Substitute or not) | Dropout Batch Normalization Inverse Hourglass Neural Network  Architecture:   | Input layer | | --- | | 256 nodes dense layer | | Dropout layer (rate = 0.2) | | Batch normalization layer | | 128 nodes dense layer | | Dropout layer (rate = 0.2) | | Batch normalization layer | | 256 nodes dense layer | | Dropout layer (rate = 0.2) | | Batch normalization layer | | Output layer | | Dropout Batch Normalization Inverse Hourglass Neural Network  Architecture:   | Input layer | | --- | | 256 nodes dense layer | | Dropout layer (rate = 0.2) | | Batch normalization layer | | 128 nodes dense layer | | Dropout layer (rate = 0.2) | | Batch normalization layer | | 256 nodes dense layer | | Dropout layer (rate = 0.2) | | Batch normalization layer | | Output layer | |
| Best CLF-2  (Complement or unrelated) | NN3-64-1  Architecture:   | Input layer | | --- | | 64 nodes dense layer | | Output layer | | K-Nearest Neighbor (K=1) |

## B.4 Predicting Labels with Trained Models

As the last step, we retrained the two best models on all labeled data from AMT to conduct the label classification for the unlabeled product pairs. Table B.8 shows the summary statistics of the observed and predicted product relationship labels. Tables B.9 and B.10 show the examples of substitutes and complements predicted by our machine learning models.

**Table B.8 Summary Statistics of AMT and Predicted Labels**

| Data | Home/Garden Products | | Technology Products | |
| --- | --- | --- | --- | --- |
|  | Labels from AMT | Predicted Labels | Labels from AMT | Predicted Labels |
| Substitutes | 2,409 (40.15%) | 292,595 (41.27%) | 3,106 (51.77%) | 54,651 (51.64%) |
| Complements | 629 (10.48%) | 38,693 ( 5.46%) | 1,137 (18.95%) | 19,869 (18.77%) |
| Unrelated | 2,962 (49.37%) | 377,668 (53.27%) | 1,757 (29.28%) | 31,316 (29.59%) |
| Total Pairs | 6,000 (100.0%) | 708,956 (100.0%) | 6,000 (100.0%) | 105,836 (100.0%) |

**Table B.9 Examples of Substitutes Predicted by Supervised Machine Learning Model**

| **Product 1** | **Product 2** |
| --- | --- |
| **Technology Products** | |
| LG 42LB5500 42 Inch Full HD LED TV | Toshiba 40L2433DB 40 Inch Full HD LED TV |
| Tilting 42 Inch TV Wall Bracket. | Multi-Position 32 Inch Superior TV Wall Bracket. |
| Canon Pixma MG2550 All-In-One Printer. | Canon Pixma iP2850 Desktop Inkjet Printer. |
| Toshiba C50-B-13N Celeron 15.6 Inch 4GB 1TB Laptop. | Lenovo S20-30 Celeron 11.6 Inch 2GB 320GB Laptop. |
| JVC Sports In-Ear Headphones - Black. | Sennheiser CX160 In-Ear Headphones - Black. |
| Vodafone Samsung Galaxy S4 Mobile Phone - Black. | Sim Free Samsung Galaxy Note 4 Mobile Phone - White. |
| EE Huawei Ascend Y550 Mobile Phone - Black. | EE Nokia Lumia 635 Mobile Phone - Black. |
| Switch Easy Nude iPhone 5/5s Case - Black. | Guess Stud iPhone 5/5S Flip Case - Black. |
| FIFA 15 XBox One Game. | WWE 2K15 XBox 1 Game. |
| Nikon Coolpix L830 16MP Bridge Camera - Red. | Vivitar VS332 16MP Bridge Camera - Red. |
| **Home/Garden Products** | |
| Silentnight Breatheasy Contour Pillow | Living V-Shaped Feather Body Support Pillow |
| Butterfly Fusion Duvet Cover Set - Double. | Botanical Red Embroidered Bedding Set – Double |
| ColourMatch Pair of Hand Towels - Apple Green. | Heart of House Egyptian Single Hand Towel - Soft Lime. |
| Damask Black Bedding Set - Kingsize. | New York Reflections Bedding Set - Kingsize. |
| ColourMatch Lima Eyelet Curtains | Bromley Eyelet Curtain |
| Bush BFFF55152S Fridge Freezer - Silver. | Candy CCBF5172WK Fridge Freezer - White. |
| Hotpoint UHS53XS Built-Under Double Electric Oven - S/Steel. | Bush AE6BFS Built-In Single Electric Fan Oven-Store Pick Up. |
| Habitat Hana II 2 Door Wardrobe - Oak. | Arvika 3 Door Wardrobe - Light Oak Effect. |
| Graham & Brown Hearts Canvas - Set of 3. | Heart of House Red Manhattan Canvas. |
| Dino Multi Curtains - 168 x 183cm. | Tokyo Lined Eyelet Curtains - 117x183cm - Red. |
|  |  |

**Table B.10 Examples of Complements Predicted by Supervised Machine Learning Model**

| **Product 1** | **Product 2** |
| --- | --- |
| **Technology Products** | |
| Panasonic TX-L50B6B 50 Inch Full HD 1080p Freeview HD LED TV | Google Chromecast. |
| Canon EOS 70D SLR Kit inc 18-55mm lens - Black | SanDisk Extreme SDXC 128GB Memory Card. |
| Canon Pixma MX475 All-in-One Wi-Fi Printer. | Asus EeeBook X205TA 11.6 Inch 2GB 32GB Laptop. |
| Belkin Optical Audio Cable - 1.8m. | Sony HTCT60BT.CEK 60W Soundbar with Subwoofer. |
| McAfee Live Safe - Unlimited Devices. | HP 14-x000na 2GB 16GB 14 Inch Chromebook. |
| Nikon Bridge Camera Case - Black. | Sony DSCH400 20MP Bridge Camera - Black. |
| Xbox One Wireless Controller. | Xbox One 500GB Console. |
| Velbon DF-51 Camera Tripod - Black. | Sony HDR-PJ530 Camcorder - Black. |
| Canon DSLR Camera Bag - Black. | Canon EOS 700D 18MP DSLR Camera with 18-55mm Lens - Black. |
| Vivitar Digital Camera Starter Kit - 20 Piece. | Vivitar X022 10MP Compact Digital Camera - Red. |
| **Home/Garden Products** | |
| ColourMatch Super White Housewife Pillowcase - 2 Pack | Heart of House Deep Red Non Iron Fitted Sheet – Kingsize |
| Slumberdown Big Hug Pillows - 2 Pack. | Heart of House Plum Bedding Set - Kingsize. |
| Argos Value Range Quilted Mattress Protector - Single. | Downland Downie Ball Mattress Topper - Single. |
| Habitat Latham Orange Flat Weave Cotton/Wool Rug - 120x180cm | Fantasy Fields Magic Garden Table. |
| Malibu Cabin Bed Frame - Pink On White. | Silentnight Ashley Regular Single Mattress. |
| Pack of 5 Terry Tea Towels - Red/White. | Zero Twist 6 Piece Towel Bale - Duck Egg. |
| Silentnight Miracoil Sutton Memory Single 2 Drw Divan Bed. | Silentnight Milan Single Headboard - Natural. |
| Heart of House Alston Oak Veneer 150cm Dining Table. | Elton Oak Circular Dining Table and 4 Cream Chairs. |
| Lucas Office Desk - Beech Effect. | Gas Lift Office Chair - Black. |
| Silentnight Quilted Mattress Topper and Pillow Set - Single. | Digger Stitch Children's Bedding Set - Single. |
| Russell Hobbs 15082-10 Kettle - Glass. | Russell Hobbs 21450 2 Slice Toaster - Stainless Steel. |

**B.5 Choosing the Number of Topics in LDA**

An important hyperparameter of LDA model is the number of topics. Many methods have been proposed to choose the optimal number of topics, including log-likelihood estimates, inter-topic overlap, and perplexity scores (Lee et al. 2020; Shin et al. 2020). For our purpose, we want to identify non-overlapping topics that best describe the product categories, thus inter-topic similarity is an important metric. Specifically, we want to minimize the similarity for the closest pair of topics, where the similarity is calculated by the cosine similarity of the topic vectors. LDA estimation is an iterative process to maximize the log-likelihood function. Thus, as the second metric, we measured the converged log-likelihood estimates from different LDA models.

We varied the number of topics to be 5, 10, 20, 30, 40, 50, and 100, and found that 50 is the best trade-off in terms of log-likelihood estimation and inter-topic similarity, as shown in Figures B.1 and B.2. We also note that the empirical results are robust with alternative choices of the number of topics.

**B.6 Constructed Topic Models from Home/Garden and Technology Products**

**Table B.11 10 topics from the 50-topic model of Home/Garden products**

| **Topic** | **Top five keywords** |
| --- | --- |
| 00 | curtain, bath, fittings, tap, basin |
| 01 | drawer, handles, metal, drawers, wood |
| 02 | plan, care, breakdown, purchase, years |
| 03 | clock, microwave, power, pressure, watts |
| 04 | kettle, function, boil, settings, heat |
| 05 | blind, drop, unit, safety, fittings |
| 06 | table, chairs, dining, oak, wood |
| 07 | floor, nozzle, hose, brush, cord |
| 08 | hood, led, rated, colour, chimney |
| 09 | polyester, machine, washable, duvet |

**Table B.12 10 topics from the 50-topic model of Technology products**

| Topic | Top five keywords |
| --- | --- |
| 00 | microphone, recording, built, pack, batteries |
| 01 | xqisit, material, protection, easy, apple |
| 02 | port, dvd, remote, record, digital |
| 03 | resolution, led, contrast, hdmi, ratio |
| 04 | galaxy, Samsung, tab, tablet, viewing |
| 05 | set, sims, ages, warriors, kitty, hello |
| 06 | print, speed, printer, printing, pages, minute |
| 07 | range, number, facility, indicator, recording |
| 08 | bluetooth, speaker, wireless, ipod, 5mm |
| 09 | tablet, bluetooth, enabled, pixels, life |

**Figure B.1. Inter-Topic Similarity of LDA models**

| (a) LDA models of Home/Garden products | (b) LDA models of Technology products |
| --- | --- |

**Figure B.2. Log Likelihood Estimates of LDA Models**

| (a) LDA models of Home/Garden products | (b) LDA models of Technology products |
| --- | --- |

**Online Supplementary Appendix C**

**Table C.1 Variable Descriptions**

| **Variables** | **Descriptions** |
| --- | --- |
| purchase | whether a consumer purchase a product in an online session (unit: 0, 1) |
| rating_focal | mean rating of focal product (range: 1~5) |
| vol_focal | mean volume of focal product reviews (range: 0+) |
| vol_subs | mean volume of reviews of substitutive products (range: 0+) |
| vol_comp | mean volume of reviews of complementary products (range: 0+) |
| rating_subs | mean rating of substitutive products (range: 1~5; for all rating variables) |
| rating_comp | mean rating of complementary products |
| rating_subs_samebrand | mean rating of substitutes produced by the same brand |
| rating_comp_diffbrand | mean rating of complements produced by the same brand |
| rating_subs_diffbrand | mean rating of substitutes produced by different brands |
| rating_comp_diffbrand | mean rating of complements produced by different brands |
| var_focal_viewed | variance of ratings of viewed reviews of focal product at product viewing time |
| var_subs_viewed | mean of viewed rating variance of substitute products viewed by consumer |
| var_comp_viewed | mean of viewed rating variance of complementary products viewed by consumer |
| price_focal | price of focal product (unit: £) |
| price_comp | mean price of complements of focal product (unit: £) |
| price_comp_random | price of a randomly selected complement of focal product (unit: £) |
| price_subs | mean price of substitutes of focal product (unit: £) |
| price_subs_random | price of a randomly selected substitute of focal product (unit: £) |
| sess_count_samecate | number of previous online sessions in the same subcategory |
| purchases_samecate | number of previous purchases in the same subcategory |
| mobile | whether a mobile device is used in an online session (unit: 0, 1) |
| rating_subs_mobile | rating_subs * mobile |
| rating_comp_mobile | rating_comp * mobile |

**Data Summary Statistics**

We provide summary statistics in two product categories: Home/Garden and Technology. Tables C.2 and C.3 are for Home/Garden and Technology, respectively. Among the total product-session observations (493,928 for Home/Garden and 202,454 for Technology), we have observations with missing variables. For example, for the observations of products without any online product reviews, we use 0 for *vol_focal* but treated them as missing data for average rating variables (e.g., *rating_focal*, *rating_subs*, *rating_comp*, etc.).

**Table C.2 Summary Statistics of Home/Garden Data**

| Variables | Min | Max | Avg. | Std. |
| --- | --- | --- | --- | --- |
| purchase | 0.0 | 1.0 | 0.042 | 0.199 |
| rating_focal | 1.0 | 5.0 | 4.077 | 0.720 |
| vol_focal | 0.0 | 1,829.0 | 76.548 | 162.663 |
| rating_subs | 1.0 | 5.0 | 4.036 | 0.655 |
| rating_comp | 1.0 | 5.0 | 4.067 | 0.646 |
| rating_subs_samebrand | 1.0 | 5.0 | 4.116 | 0.701 |
| rating_comp_samebrand | 1.0 | 5.0 | 4.169 | 0.549 |
| rating_subs_diffbrand | 1.0 | 5.0 | 4.018 | 0.667 |
| rating_comp_diffbrand | 1.0 | 5.0 | 4.055 | 0.661 |
| price_focal | 0.0 | 999.99 | 64.117 | 76.863 |
| price_subs | 0.0 | 999.99 | 78.109 | 87.813 |
| price_subs_random | 0.0 | 999.99 | 77.841 | 90.660 |
| price_comp | 0.0 | 869.99 | 52.695 | 68.895 |
| price_comp_random | 0.0 | 999.99 | 52.649 | 72.729 |
| mobile | 0.0 | 1.0 | 0.347 | 0.476 |

**Table C.3 Summary Statistics of Technology Data**

| Variables | Min | Max | Avg. | Std. |
| --- | --- | --- | --- | --- |
| purchase | 0.0 | 1.0 | 0.037 | 0.190 |
| rating_focal | 1.0 | 5.0 | 4.271 | 0.628 |
| vol_focal | 0.0 | 866.0 | 50.220 | 91.819 |
| rating_subs | 1.0 | 5.0 | 4.245 | 0.556 |
| rating_comp | 1.0 | 5.0 | 4.190 | 0.658 |
| rating_subs_samebrand | 1.0 | 5.0 | 4.296 | 0.593 |
| rating_comp_samebrand | 1.0 | 5.0 | 4.284 | 0.583 |
| rating_subs_diffbrand | 1.0 | 5.0 | 4.204 | 0.577 |
| rating_comp_diffbrand | 1.0 | 5.0 | 4.169 | 0.675 |
| price_focal | 0.0 | 2399.9 | 126.382 | 143.384 |
| price_subs | 0.0 | 2399.9 | 127.896 | 139.267 |
| price_subs_random | 0.0 | 2399.9 | 128.049 | 143.562 |
| price_comp | 0.0 | 2399.9 | 108.571 | 141.761 |
| price_comp_random | 0.0 | 2399.9 | 108.496 | 146.136 |
| Mobile | 0.0 | 1.0 | 0.287 | 0.452 |

**Online Supplementary Appendix D**

Our estimation results show that the ratings of related products have a spillover effect on the focal product purchase; furthermore, the effect is even *stronger* than the effect of ratings of the same product. A possible explanation is that the spillover effect comes from the combination of the demand substitution effect and the cross-product rating effect (i.e., the reference/contextual point effect). To help understanding, we delineate our result from a simple analytical model as follows.

Consider the following scenario: consumers look at the online rating for product B, and also look at that for product A, to make a purchase decision between the two. We refer to Product A as the focal product, and product B as the substitutive product to the focal product. The notations are:

: the mean rating for Product A (focal)

: the mean rating for Product B (substitutive)

: the perceived utility from purchasing a product with the mean rating *y*. For simplicity, we assume a linear form: where .

In brief, if we consider the demand substitution effect only (1), the spillover effect is the same as the focal effect. However, considering the reference/contextual point effect together (2), the combined effect is even larger than the focal effect. The size of the spillover effect depends on the model parameter of the reference point. The sketch of our derivation and result is as follows:

1. **Baseline model** **considering the demand substitution effect** **only**

We model consumer preference with a typical location model. Products A and B are located at positions 0 and 1 of a line of length 1, respectively, and consumers are uniformly distributed along the line. The distance between a consumer and a product measures the degree of misfit of the product to the consumer. The misfit cost is the degree of misfit times a unit misfit cost t, associated with the degree of substitution between the two products. That is, a consumer located at *x* perceives utilities of from product A and from product B. Therefore, the sales of product A, denoted as , is . Considering the demand substitution effect (i.e., an increase in is more likely to shift purchase from product A to product B), decreases in . The magnitude of the impact of the rating for the focal, product A, on its own sales () equals to that for the substitutive, product B, on (the direction is opposite): i.e., .

1. **Extended model considering both demand substitution and reference point effects**

In the baseline model, we do not consider the reference point effect. We extend our model by incorporating the reference point effect. That is, the rating of product B can work as a contextual reference point in consumers’ purchase decision. In the presence of this context-dependent preference (Tversky and Simonson 1993), a consumer located at *x* perceives utility of from the focal product A, where captures the degree of the reference point effect. The term shows the higher the contextual reference point is, the lower perceived utility of the focal product. Therefore, the sales of product A is re-written as . Considering both the demand substitution and reference point effects, the magnitude of the impact of the rating for the substitutive product B on the sales of the focal product A () is larger than that for product A on : i.e., . The magnitude difference increases in .

**References**

Acemoglu, D., S. Johnson, and J. A. Robinson. 2001. The Colonial Origins of Comparative Development: An Empirical Investigation. *American Economic Review* 91(5) 1369-1401.

Angrist, J.D. and J.S. Pischke. 2008. *Mostly Harmless Econometrics: An Empiricist's Companion*. Princeton University Press.

Angrist, J.D. and A. B. Krueger. 2001. Instrumental Variables and the Search for Identification: From Supply and Demand to Natural Experiments. *Journal of Economic Perspectives* 15(4) 69-85.

Berry, S., J. Levinsohn, and A. Pakes. 1995. Automobile Prices in Market Equilibrium. *Econometrica* 63(4) 841-890.

Blei, D. M., A. Y. Ng, and M. I. Jordan. 2003. Latent Dirichlet Allocation. *Journal of Machine Learning Research* 3 993-1022.

Chawla, N.V., Bowyer, K. W., Hall, L. O., and Kegelmeyer, W. P. (2002) SMOTE: Synthetic Minority Over-sampling Technique. *Journal of Artificial Intelligence Research* 16(1) 321-357.

Chung, K. Y., T. P. Derdenger, and K. Srinivasan. 2013. Economic Value of Celebrity Endorsements: Tiger Woods' Impact on Sales of Nike Golf Balls. *Marketing Science* 32(2) 271-293.

Granados, N., A. Gupta, and R. J. Kauffman. 2012. Online and Offline Demand and Price Elasticities: Evidence from the Air Travel Industry*. Information Systems Research* 23(1) 164-181.

Hausman, J. 1978. Specification Tests in Econometrics. *Econometrica* 46(6) 1251-71.

Jabr, W. and Z. Zheng. 2014. Know Yourself and Know Your Enemy: An Analysis of Firm Recommendations and Consumer Reviews in a Competitive Environment. *MIS Quarterly* 38(3) 635-654.

Kingma, Diederik and Ba, Jimmy. 2015. Adam: A Method for Stochastic Optimization. In *Proceedings of the 3rd International Conference for Learning Representations*.

Lee, G. M., S. He, J. Lee, A. B. Whinston. 2020. Matching Mobile Applications for Cross-Promotion, *Information Systems Research* 31(3) 865-891.

Luo, X., J. Zhang, B. Gu, and C. Phang. 2017. Expert Blogs and Consumer Perceptions of Competing Brands. *MIS Quarterly* 41(2), 371-395.

Mas-Colell, A., M.D. Whinston, and J.R. Green. 1995. *Microeconomic Theory*, Oxford University Press, New York.

McHugh, M. L. (2012) Interrater reliability: the kappa statistic. *Biochemia Medica* 22(3): pp. 276-282.

Riquelme, A., D. Berkowitz, and M. Caner. 2013. Valid Tests When Instrumental Variables Do Not Perfectly Satisfy the Exclusion Restriction. *Stata Journal* 13(3) 528-546.

Shi, Z. G. M. Lee, and A. B. Whinston. 2016. Toward a Better Measure of Business Proximity: Topic Modeling for Industry Intelligence. *MIS Quarterly* 40(4), 1035-1056.

Shin, D., S. He, G. M. Lee, A. B. Whinston, S. Cetintas, K.-C. Lee. 2020. Enhancing Social Media Analysis with Visual Data Analytics: A Deep Learning Approach. *MIS Quarterly* 44(4) 1459-1492.

Singh, P. V., N. Sahoo, and T. Mukhopadhyay. 2014. How to Attract and Retain Readers in Enterprise Blogging? *Information Systems Research* 25(1) 35-52.

Stock, J. H., J. H. Wright, and M. Yogo. 2002. A Survey of Weak Instruments and Weak Identification in Generalized Method of Moments. *Journal of Business & Economic Statistics* 20(4) 518-529

Tirunillai, S. and G. J. Tellis. 2014. Mining Marketing Meaning from Online Chatter: Strategic Brand Analysis of Big Data Using Latent Dirichlet Allocation. *Journal of Marketing Research* 51(4) 463-479.

Walters, R. G. 1991. Assessing the Impact of Retail Price Promotions on Product Substitution, Complementary Purchase, and Interstore Sales Displacement. *Journal of Marketing* 55(2) 17-28.

Wooldridge, J.M. 2002. *Econometrics Analysis of Cross Section and Panel Data*. MIT Press, Cambridge, MA.

1. The Sargen-Hansen test can be used for over-identification only, which means the number of IVs is greater than the number of endogenous variables. However, our case is an exact-identified model, and we conducted the Hausman test. [↑](#footnote-ref-1)
2. We may consider calculating product similarity by keyword overlaps, but it has a limitation that related keywords (e.g., mobile and phone) are treated as unrelated dimensions. Topic modeling overcomes this issue. [↑](#footnote-ref-2)
3. The choice of cosine similarity is not critical as other similarity measures produce consistent classifications. An alternative approach to cosine similarity is Kullback-Leibler divergence, but it does not have the property of symmetry. [↑](#footnote-ref-3)
4. Note that this feature group using co-visit data may not be feasible for new products. [↑](#footnote-ref-4)
5. Note that this feature group using review data may not be feasible for new products. [↑](#footnote-ref-5)
6. We thank an anonymous reviewer to encourage us to provide detailed procedures of the developed classifiers. [↑](#footnote-ref-6)
7. <https://keras.io> [↑](#footnote-ref-7)
8. <https://scikit-learn.org/stable/> [↑](#footnote-ref-8)
